# Supplementary material
Source: publisher figshare collection journal article supplement (https://karger.figshare.com/ndownloader/files/40825220)
Supplement: Supplementary file 1 [file 40825220]

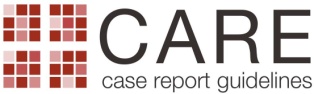
CARE Checklist of information to include when writing a case report
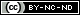


**Topic Item Checklist item description Reported on Line**

**Title 1** The diagnosis or intervention of primary focus followed by the words “case report” P1

**Key Words 2** 2 to 5 key words that identify diagnoses or interventions in this case report, including "case report" P1

Abstract

**(no references)**

**3a** Introduction: What is unique about this case and what does it add to the scientific literature? P2, L11

**3b** Main symptoms and/or important clinical findings P2, L3-5

**3c** The main diagnoses, therapeutic interventions, and outcomes P2, L6-10

**3d** Conclusion—What is the main “take-away” lesson(s) from this case? P2, L11

**Introduction 4** One or two paragraphs summarizing why this case is unique (**may include references**) P3, L17-34

**Patient Information 5a** De-identified patient specific information P3, L36-38

P4, L39-50

**-5b** Primary concerns and symptoms of the patient P3, L36-41

**5c** Medical, family, and psycho-social history including relevant genetic information P3, L41-43

**5d** Relevant past interventions with outcomes P3, L41

Clinical Findings

**Timeline**

**Diagnostic Assessment**

**Therapeutic Intervention**

**Follow-up and Outcomes**

1. Describe significant physical examination (PE) and important clinical findings P4, L52-54
2. Historical and current information from this episode of care organized as a timeline P4

**8a** Diagnostic testing (such as PE, laboratory testing, imaging, surveys). P4, L54-63

**8b** Diagnostic challenges (such as access to testing, financial, or cultural) P4, L54-63

**8c** Diagnosis (including other diagnoses considered) P4, L65

**8d** Prognosis (such as staging in oncology) where applicable

**9a** Types of therapeutic intervention (such as pharmacologic, surgical, preventive, self-care) P4, L67-70

**9b** Administration of therapeutic intervention (such as dosage, strength, duration)

**9c** Changes in therapeutic intervention (with rationale) P5, L67-70

**10a** Clinician and patient-assessed outcomes (if available) No available

**10b** Important follow-up diagnostic and other test results P8. L178-186

**10c** Intervention adherence and tolerability (How was this assessed?) P8, L194

**10d** Adverse and unanticipated events

**Discussion 11a** A scientific discussion of the strengths AND limitations associated with this case report P8

**11b** Discussion of the relevant medical literature **with references** P4-8

**11c** The scientific rationale for any conclusions (including assessment of possible causes) P8, L183-193

**11d** The primary “take-away” lessons of this case report (without references) in a one paragraph conclusion P9, L197-206

**Patient Perspective 12** The patient should share their perspective in one to two paragraphs on the treatment(s) they received P9

**Informed Consent 13** Did the patient give informed consent? Please provide if requested . . . . . . . . . . . . . . . . . . . . . . . . . . . . . . . . . . . . .. **Yes * No**
